# Supplementary material for: Determining the Optimal Conditions for the Production by Supercritical CO2 of Biodegradable PLGA Foams for the Controlled Release of Rutin as a Medical Treatment
Source: MDPI journal article supplement (doi:10.3390/polym13101645), 2021-05-19

**Figure 6.** Effect of the considered variables on the rutin loads impregnated onto the foamed polymer samples.

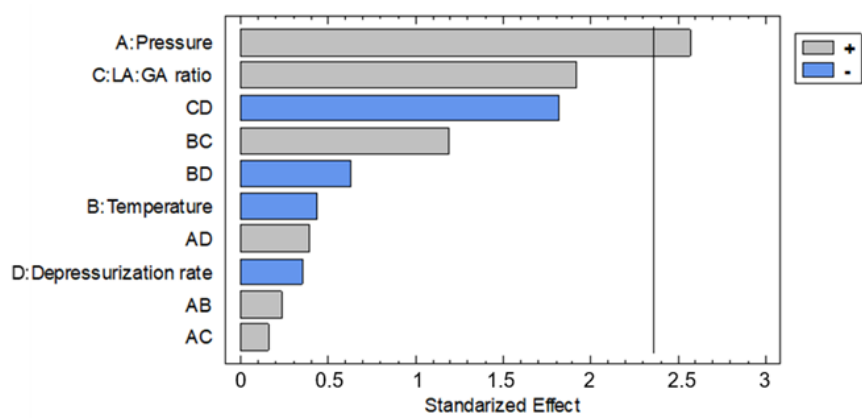

Supplement: s1 [file s1]
