# Supplementary material for: Determining the Optimal Conditions for the Production by Supercritical CO2 of Biodegradable PLGA Foams for the Controlled Release of Rutin as a Medical Treatment
Source: MDPI journal article supplement (doi:10.3390/polym13101645), 2021-05-19

**Figure 15.** Standardized pareto diagram corresponding to the percentage of rutin released into the PBS solution after 8 h.

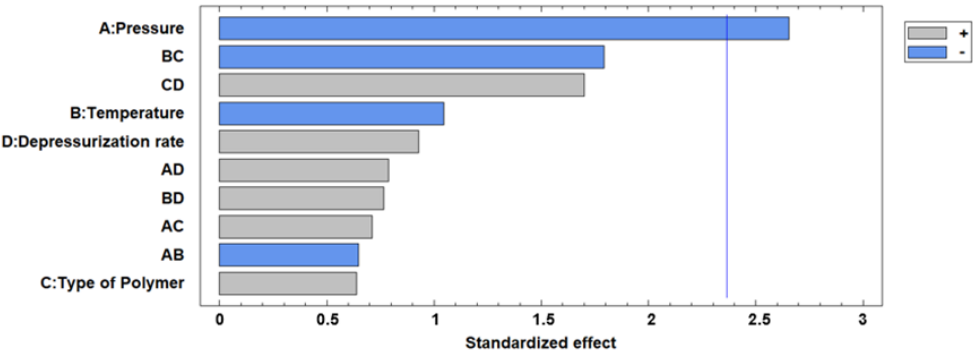

Supplement: s1 [file s1]
