# Supplementary material for: Determining the Optimal Conditions for the Production by Supercritical CO2 of Biodegradable PLGA Foams for the Controlled Release of Rutin as a Medical Treatment
Source: Polymers (Basel). 2021 May 19;13(10):1645. doi: 10.3390/polym13101645 (PMC8158779; doi:10.3390/polym13101645)
Supplement: Supplementary file 1 [file polymers-13-01645-s001.zip]

Archive with 16 entries (16 files):
- Figure 5.pdf
- Figure 6.pdf
- Figure 7.pdf
- Figure 8.pdf
- Figure 9.pdf
- Figure 10.pdf
- Figure 11.pdf
- Figure 12.pdf
- Figure 13.pdf
- Figure 14.pdf
- Figure 15.pdf
- Figure 16.pdf
- Figure 1.pdf
- Figure 2.pdf
- Figure 3.pdf
- Figure 4.pdf
